# Supplementary material for: Hydrogels of arrested phase separation simultaneously achieve high strength and low hysteresis
Source: PubMed Central journal article supplement — Sci Adv. 2023 Jun 30;9(26):eadh7742. doi: 10.1126/sciadv.adh7742 (PMC10313164; doi:10.1126/sciadv.adh7742), 2023-06-30
Supplement: sciadv.adh7742_sm.pdf [file sciadv.adh7742_sm.pdf]

Supplementary Materials for  
**Hydrogels of arrested phase separation simultaneously achieve high strength  
and low hysteresis**

Guogao Zhang *et al.*

Corresponding author: Zhigang Suo, suo@seas.harvard.edu

*Sci. Adv.* **9**, eadh7742 (2023)  
DOI: 10.1126/sciadv.adh7742

**The PDF file includes:**

Supplementary Texts 1 and 2  
Figs. S1 to S10  
Table S1  
Legends for movies S1 and S2

**Other Supplementary Material for this manuscript includes the following:**

Movies S1 and S2

### Supplementary Text 1

For the PEA used in this work, the entanglements greatly outnumber crosslinks, so that chain length determined by the entanglements instead of the chemical crosslinks is used to predict the rupture stretch. The entanglement molecular weight of PEA is  $\sim 12,000 \text{ g mol}^{-1}$ , and the molecular weight of its monomer is  $\sim 100 \text{ g mol}^{-1}$ , which gives a chain length,  $n \sim 120$  monomers (21). We adopt a freely-jointed model to predict the rupture stretch (13). In the undeformed state, the mean-square-root distance between the two ends of the polymer chain is  $\sqrt{na}$ , where  $a$  is the length of a repeating unit. In the state right before rupture, the polymer chain is fully extended and its length becomes  $na$ . Consequently, the predicted rupture stretch is  $\sqrt{n}$ . Using the representative value of  $n \sim 120$  gives a predicted rupture stretch  $\sim 11$ .

### Supplementary Text 2

A stage III PEA-PAAc hydrogel contains 15.6 wt% PEA, 56.3 wt% PAAc, and 28.1 wt% water. The corresponding stage IV sample contains 5.3 wt% PEA, 19.1 wt% PAAc, and 75.6 wt% water. We use these mass fractions to estimate the rule of mixture of the strength of the PEA-PAAc hydrogel.

The fractocohesive length is estimated as  $\Gamma/W_f$ , where  $\Gamma$  is the toughness and  $W_f$  is the work of fracture (26). The work of fracture is obtained from the area under the loading curves. For pure PEA,  $\Gamma \sim 1,400 \text{ J m}^{-2}$  and  $W_f \sim 12.04 \text{ MJ m}^{-3}$ , which gives a  $\Gamma/W_f \sim 116 \text{ }\mu\text{m}$ . For PEA-PAAc hydrogel,  $\Gamma \sim 1650 \text{ J m}^{-2}$  and  $W_f \sim 6.6 \text{ MJ m}^{-3}$ , which gives a  $\Gamma/W_f \sim 262 \text{ }\mu\text{m}$ .

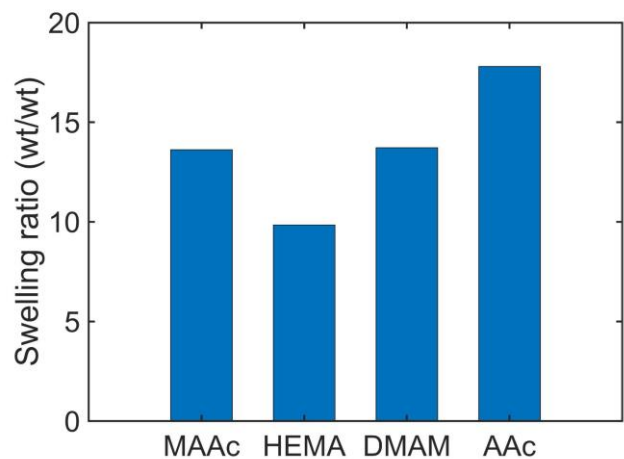

**Fig. S1. PEA elastomer swells to equilibrium in several liquid monomers of hydrogels.** PEA elastomers are submerged in the liquid monomers to swell to equilibrium. The swelling ratio is defined by the weight ratio of the PEA elastomer after swelling to equilibrium and the pristine PEA elastomer. MAAc: methacrylic acid; HEMA: (hydroxyethyl)methacrylate; DMAM: *N,N*-dimethylacrylamide; AAc: acrylic acid.

**Table S1. The modulus, strength, and hysteresis of the PEA-PAAc hydrogel, PAAc hydrogel, and PEA elastomer.**

|                   | Modulus (kPa) |       | Strength (MPa) |       | Hysteresis (%) |       |
|-------------------|---------------|-------|----------------|-------|----------------|-------|
|                   | Average       | STDEV | Average        | STDEV | Average        | STDEV |
| PEA-PAAc hydrogel | 440.8         | 19.6  | 6.7            | 0.2   | 16.9           | 0.2   |
| PAAc hydrogel     | 160.7         | 5.7   | 0.40           | 0.07  | 2.1            | 0.2   |
| PEA elastomer     | 609.1         | 23.1  | 2.6            | 0.2   | 6.7            | 0.1   |

The test for each composition is repeated using five samples.

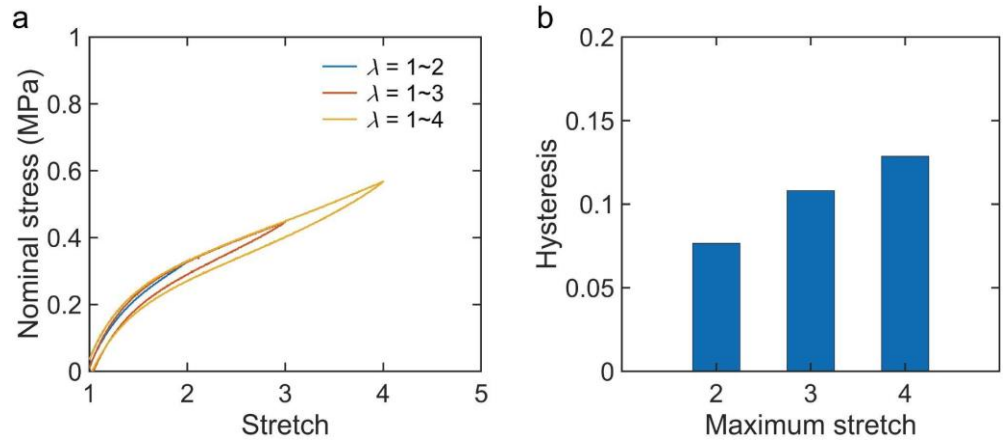

**Fig. S2. Pure PEA.** **a**, Stress-stretch curves under loading and unloading of pure PEA with increasing maximum stretches. Each sample is tested for one cycle. **b**, The hysteresis of pure PEA at different maximum stretches.

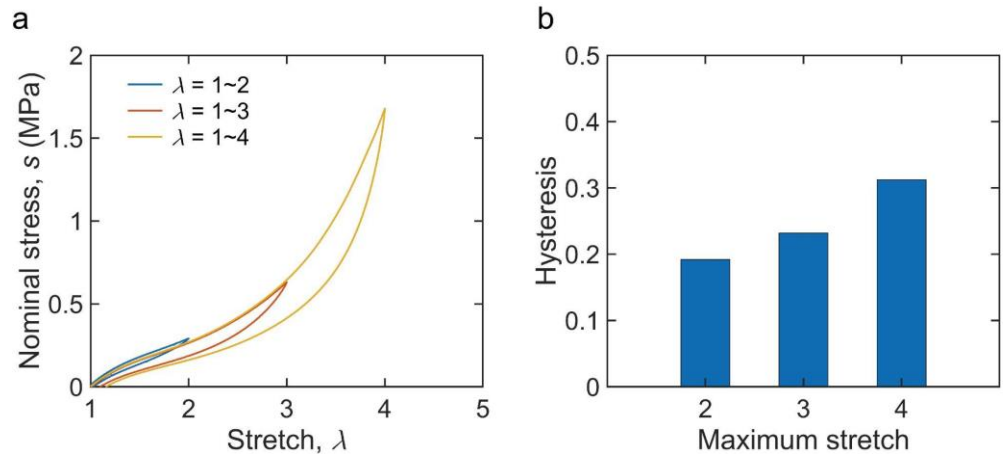

**Fig. S3. PEA-PAAc hydrogel. a**, Stress-stretch curves under loading and unloading of the PEA-PAAc hydrogel with increasing maximum stretches. Each sample is tested for one cycle. **b**, The hysteresis of the PEA-PAAc hydrogel at different maximum stretches.

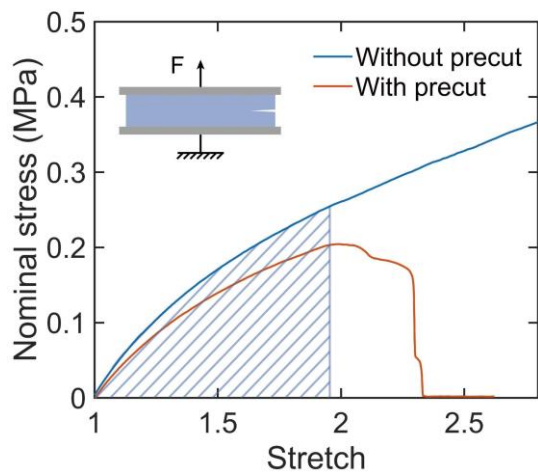

**Fig. S4. The toughness of the PEA-PAAc hydrogel.** Two samples of the PEA-PAAc hydrogels are prepared, one with precut and the other without precut. Both samples are monotonically stretched until rupture, and the stress and stretch are recorded. The toughness is calculated as the area under the curve of the uncut sample between stretch 1 and  $\lambda_{\max}$ , where  $\lambda_{\max}$  is the stretch when the crack starts to propagate in the precut sample.

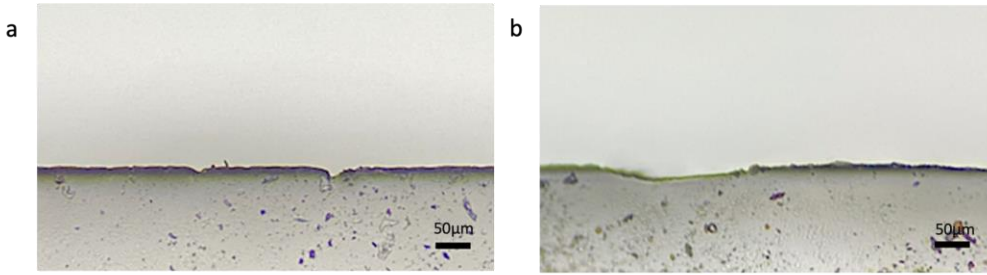

**Fig. S5.** The microscopic images of the samples cut by the dumbbell shape cutter. Flaws with size  $\sim 10 \mu\text{m}$  are observed on the edge of the samples.



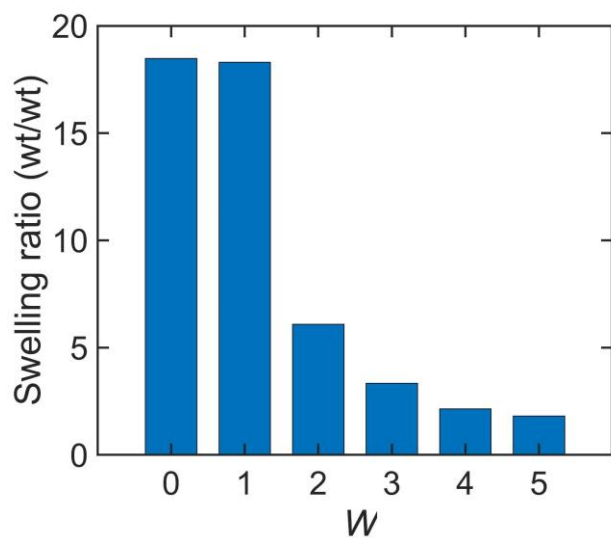

**Fig. S6. The PEA elastomer swells differently in AAc-water solution with different  $W$ .** PEA elastomers are submerged in AAc-water solutions with different  $W$  to swell to the equilibrium. The swelling ratio increases as  $W$  decreases. When  $W \leq 1$ , the swelling ratio of PEA is nearly constant.

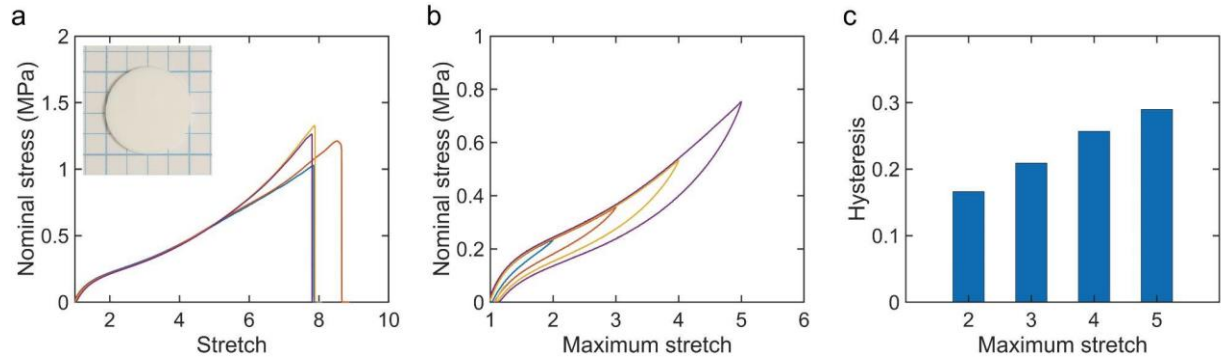

**Fig. S7. The PEA-PAAc hydrogel of  $W = 4$ .** **a**, The PEA-PAAc hydrogel of  $W = 4$  is monotonically stretched until rupture. The inset is the optical image of the hydrogel. **b**, Stress-stretch curves under loading and unloading with increasing maximum stretches. Each sample is tested for one cycle. **c**, The hysteresis at different maximum stretches.

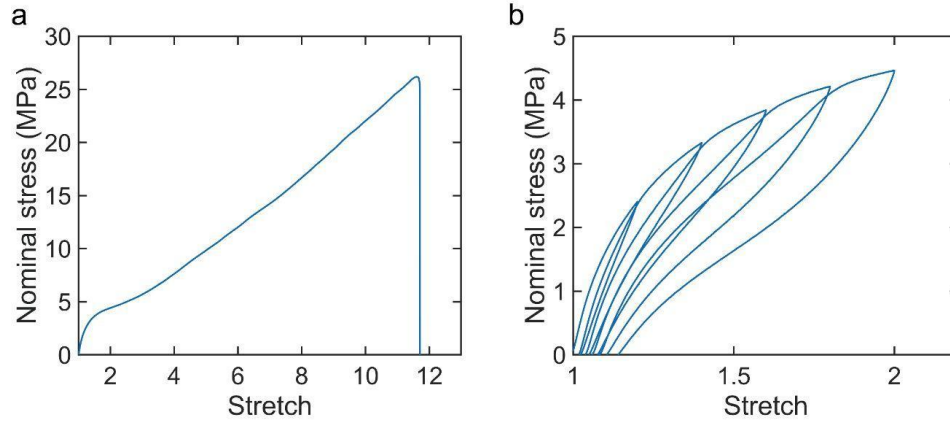

**Fig. S8. The mechanical properties of PEBAX elastomer. a,** The PEBAX elastomer is monotonically stretched until rupture. **b,** The stress-stretch curves of one PEBAX during cyclic loading with increasing maximum stretches. The same PEBAX sample is tested continuously throughout the test.

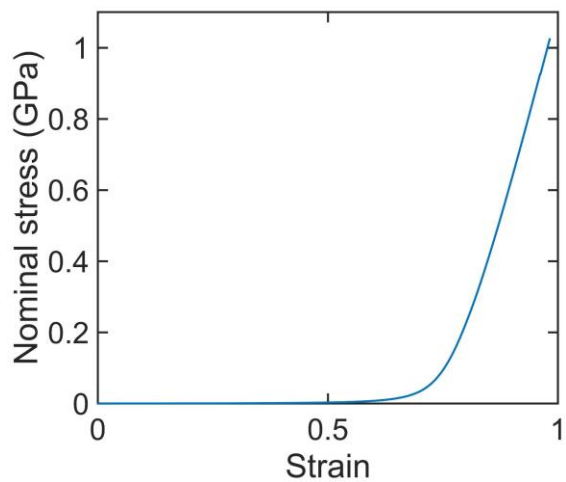

**Fig. S9. The compressive test of the PEBAx-PAAc hydrogel.** A disk of the PEBAx-PAAc hydrogel (diameter ~ 3 mm) is compressed monotonically. The maximum stress that can be applied is limited by the Instron machine, and the sample does not rupture after the compression.

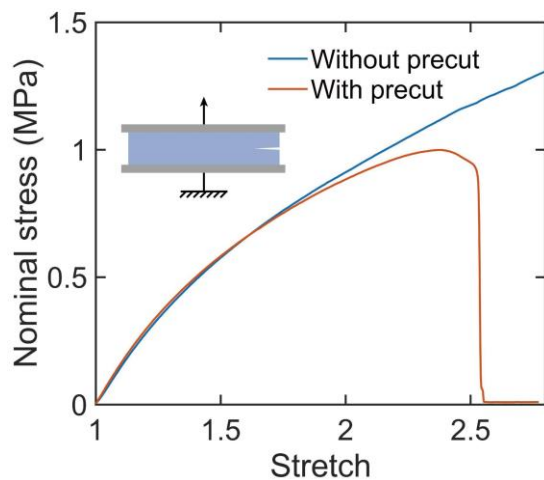

**Fig. S10. The toughness test of the PEBAx-PAAc hydrogel.** Two samples of the PEBAx-PAAc hydrogels are prepared, one with precut and the other without precut. Both samples are monotonically stretched until rupture, and the stress and stretch are recorded. The toughness is obtained from the area under the curve of the uncut sample between stretch 1 and  $\lambda_{\max}$ , where  $\lambda_{\max}$  is the stretch when the crack starts to propagate in the precut sample.

Movie S1. The PEA-PAAc hydrogel is stretched and then released by hand.

Movie S2. The PEA-PAAc hydrogel is used to lift a gallon (3.8 liters) of water.
